# Supplementary material
Source: PubMed Central journal article supplement (PMC4269747)
Supplement: jcbfm2014164x1.pdf [file jcbfm2014164x1.pdf]

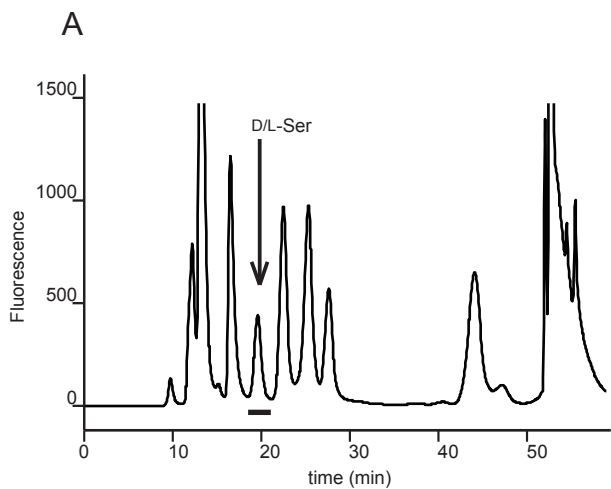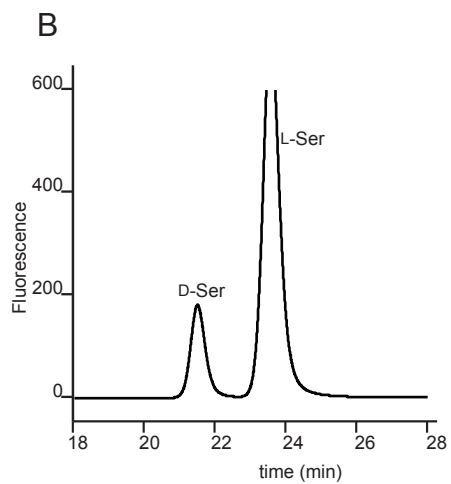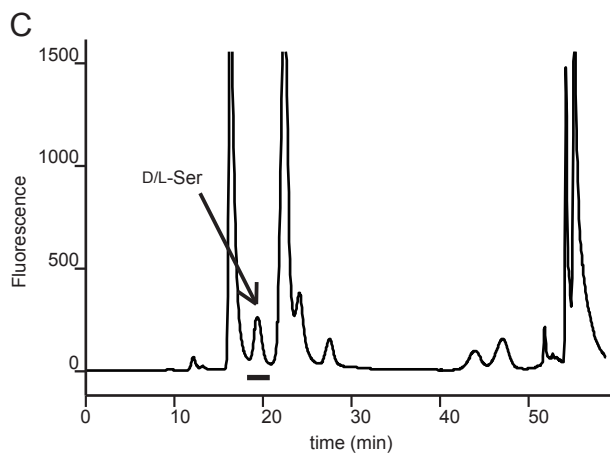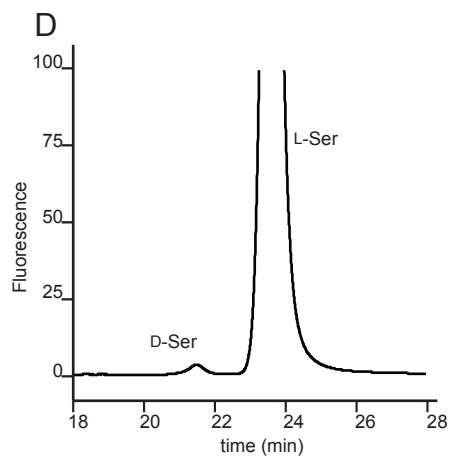

**Supplemental Figure.** Determination of serine enantiomers using 2D-HPLC. Chromatograms showing the 2D separation of D-/L-serine in the brain lysate after reperfusion (A and B) or in the culture medium (C and D). The reversed-phase separation of NBD-serine was performed using a microbore ODS column. The black bars indicate the fractions online collected to a loop and transferred to the enantioselective column. (B and D) NBD-F-serine enantiomers were further separated using an enantioselective column, (Sumichiral OA-2500S).
